# Supplementary material for: Global burden of occupational ergonomic factor-induced low back pain, 1990~2021: data analysis and projections of the global burden of disease
Source: Front Public Health. 2025 May 27;13:1573828. doi: 10.3389/fpubh.2025.1573828 (PMC12148919; doi:10.3389/fpubh.2025.1573828)
Supplement: Supplementary file 1 [file Table_1.xlsx]

## Sheet: map_1990 and 2021
	measure	location	sex	age	cause	rei	metric	year	val	upper	lower	year	val	upper	lower	difference
1	YLDs (Years Lived with Disability)	China	Both	Age-standardized	Low back pain	Occupational ergonomic factors	Rate	1990	400.922	629.302	230.278	2021	254.531	403.002	147.171	-146.391
2	YLDs (Years Lived with Disability)	Lao People's Democratic Republic	Both	Age-standardized	Low back pain	Occupational ergonomic factors	Rate	1990	500.864	780.2	297.675	2021	418.236	658.534	242.556	-82.6276
3	YLDs (Years Lived with Disability)	Indonesia	Both	Age-standardized	Low back pain	Occupational ergonomic factors	Rate	1990	326.029	517.332	188.032	2021	307.269	486.976	176.08	-18.7592
4	YLDs (Years Lived with Disability)	Taiwan (Province of China)	Both	Age-standardized	Low back pain	Occupational ergonomic factors	Rate	1990	243.721	360.658	151.916	2021	273.471	387.963	181.705	29.7491
5	YLDs (Years Lived with Disability)	Cambodia	Both	Age-standardized	Low back pain	Occupational ergonomic factors	Rate	1990	530.898	825.528	309.981	2021	449.73	706.202	261.962	-81.1678
6	YLDs (Years Lived with Disability)	Democratic People's Republic of Korea	Both	Age-standardized	Low back pain	Occupational ergonomic factors	Rate	1990	359.367	584.702	195.043	2021	348.061	560.015	193.762	-11.306
7	YLDs (Years Lived with Disability)	Sri Lanka	Both	Age-standardized	Low back pain	Occupational ergonomic factors	Rate	1990	200.527	323.331	114.816	2021	221.626	356.993	125.982	21.0985
8	YLDs (Years Lived with Disability)	Maldives	Both	Age-standardized	Low back pain	Occupational ergonomic factors	Rate	1990	190.621	309.255	107.312	2021	168.923	273.806	97.3621	-21.6989
9	YLDs (Years Lived with Disability)	Philippines	Both	Age-standardized	Low back pain	Occupational ergonomic factors	Rate	1990	266.854	417.547	157.118	2021	202.046	316.769	118.948	-64.8075
10	YLDs (Years Lived with Disability)	Malaysia	Both	Age-standardized	Low back pain	Occupational ergonomic factors	Rate	1990	201.358	309.658	120.306	2021	170.443	269.725	98.2751	-30.9152
11	YLDs (Years Lived with Disability)	Myanmar	Both	Age-standardized	Low back pain	Occupational ergonomic factors	Rate	1990	225.209	363.373	125.639	2021	240.952	384.278	135.998	15.7429
12	YLDs (Years Lived with Disability)	Timor-Leste	Both	Age-standardized	Low back pain	Occupational ergonomic factors	Rate	1990	269.732	433.768	149.862	2021	207.55	332.542	117.522	-62.1824
13	YLDs (Years Lived with Disability)	Thailand	Both	Age-standardized	Low back pain	Occupational ergonomic factors	Rate	1990	291.871	455.977	170.3	2021	285.79	454.575	160.557	-6.08084
14	YLDs (Years Lived with Disability)	Viet Nam	Both	Age-standardized	Low back pain	Occupational ergonomic factors	Rate	1990	237.371	367.127	140.678	2021	272.312	425.445	160.324	34.9404
15	YLDs (Years Lived with Disability)	Kiribati	Both	Age-standardized	Low back pain	Occupational ergonomic factors	Rate	1990	61.6642	105.495	31.8426	2021	140.89	233.067	78.4882	79.2262
16	YLDs (Years Lived with Disability)	Fiji	Both	Age-standardized	Low back pain	Occupational ergonomic factors	Rate	1990	124.446	195.609	71.3243	2021	114.777	180.784	65.2692	-9.66882
17	YLDs (Years Lived with Disability)	Marshall Islands	Both	Age-standardized	Low back pain	Occupational ergonomic factors	Rate	1990	142.201	231.489	79.1529	2021	120.241	194.548	66.3261	-21.9595
18	YLDs (Years Lived with Disability)	Micronesia (Federated States of)	Both	Age-standardized	Low back pain	Occupational ergonomic factors	Rate	1990	142.822	228.56	79.7692	2021	192.314	307.13	110.426	49.4913
19	YLDs (Years Lived with Disability)	Papua New Guinea	Both	Age-standardized	Low back pain	Occupational ergonomic factors	Rate	1990	156.559	256.004	85.5751	2021	223.272	367.893	121.656	66.7126
20	YLDs (Years Lived with Disability)	Samoa	Both	Age-standardized	Low back pain	Occupational ergonomic factors	Rate	1990	265.71	426.995	145.231	2021	201.165	331.221	110.29	-64.5447
21	YLDs (Years Lived with Disability)	Solomon Islands	Both	Age-standardized	Low back pain	Occupational ergonomic factors	Rate	1990	115.538	194.429	60.4775	2021	313.584	495.209	180.251	198.046
22	YLDs (Years Lived with Disability)	Tonga	Both	Age-standardized	Low back pain	Occupational ergonomic factors	Rate	1990	198.847	315.248	114.808	2021	192.284	317.123	106.149	-6.56221
23	YLDs (Years Lived with Disability)	Vanuatu	Both	Age-standardized	Low back pain	Occupational ergonomic factors	Rate	1990	387.534	626.233	217.191	2021	421.432	674.798	238.385	33.8975
24	YLDs (Years Lived with Disability)	Armenia	Both	Age-standardized	Low back pain	Occupational ergonomic factors	Rate	1990	447.899	725.159	245.936	2021	468.271	749.232	263.486	20.3721
25	YLDs (Years Lived with Disability)	Azerbaijan	Both	Age-standardized	Low back pain	Occupational ergonomic factors	Rate	1990	469.758	741.591	271.169	2021	441.057	704.04	252.767	-28.7004
26	YLDs (Years Lived with Disability)	Georgia	Both	Age-standardized	Low back pain	Occupational ergonomic factors	Rate	1990	502.047	794.825	285.368	2021	500.721	791.65	287.425	-1.32579
27	YLDs (Years Lived with Disability)	Kazakhstan	Both	Age-standardized	Low back pain	Occupational ergonomic factors	Rate	1990	417.642	659.689	243.114	2021	354.306	557.056	204.954	-63.3365
28	YLDs (Years Lived with Disability)	Kyrgyzstan	Both	Age-standardized	Low back pain	Occupational ergonomic factors	Rate	1990	488.417	786.281	274.99	2021	402.478	640.581	231.114	-85.9393
29	YLDs (Years Lived with Disability)	Mongolia	Both	Age-standardized	Low back pain	Occupational ergonomic factors	Rate	1990	477.997	773.454	267.588	2021	384.228	609.05	219.938	-93.7689
30	YLDs (Years Lived with Disability)	Tajikistan	Both	Age-standardized	Low back pain	Occupational ergonomic factors	Rate	1990	393.454	653.721	214.899	2021	355.585	581.967	194.526	-37.8694
31	YLDs (Years Lived with Disability)	Turkmenistan	Both	Age-standardized	Low back pain	Occupational ergonomic factors	Rate	1990	385.556	622.544	213.345	2021	354.4	577.138	192.169	-31.1551
32	YLDs (Years Lived with Disability)	Uzbekistan	Both	Age-standardized	Low back pain	Occupational ergonomic factors	Rate	1990	476.945	762.372	269.603	2021	462.335	733.591	266.807	-14.6101
33	YLDs (Years Lived with Disability)	Albania	Both	Age-standardized	Low back pain	Occupational ergonomic factors	Rate	1990	697.334	1118.08	392.569	2021	682.222	1100.36	388.186	-15.1125
34	YLDs (Years Lived with Disability)	Bosnia and Herzegovina	Both	Age-standardized	Low back pain	Occupational ergonomic factors	Rate	1990	333.308	560.093	180.972	2021	351.065	552.17	200.763	17.7573
35	YLDs (Years Lived with Disability)	Bulgaria	Both	Age-standardized	Low back pain	Occupational ergonomic factors	Rate	1990	377.646	588.717	217.056	2021	358.352	550.45	213.779	-19.2936
36	YLDs (Years Lived with Disability)	Croatia	Both	Age-standardized	Low back pain	Occupational ergonomic factors	Rate	1990	365.118	584.077	207.546	2021	368.6	586.964	213.093	3.48187
37	YLDs (Years Lived with Disability)	Czechia	Both	Age-standardized	Low back pain	Occupational ergonomic factors	Rate	1990	387.179	588.516	233.952	2021	359.144	545.878	215.521	-28.0347
38	YLDs (Years Lived with Disability)	North Macedonia	Both	Age-standardized	Low back pain	Occupational ergonomic factors	Rate	1990	272.075	437.041	152.366	2021	276.466	427.918	163.421	4.39177
39	YLDs (Years Lived with Disability)	Hungary	Both	Age-standardized	Low back pain	Occupational ergonomic factors	Rate	1990	363.719	556.183	217.701	2021	390.037	592.947	237.004	26.3182
40	YLDs (Years Lived with Disability)	Montenegro	Both	Age-standardized	Low back pain	Occupational ergonomic factors	Rate	1990	289.185	471.828	157.892	2021	324.635	504.235	189.016	35.4493
41	YLDs (Years Lived with Disability)	Poland	Both	Age-standardized	Low back pain	Occupational ergonomic factors	Rate	1990	519.745	807.53	305.531	2021	435.858	679.168	256.286	-83.887
42	YLDs (Years Lived with Disability)	Romania	Both	Age-standardized	Low back pain	Occupational ergonomic factors	Rate	1990	745.706	1163.22	435.855	2021	571.824	903.987	325.063	-173.882
43	YLDs (Years Lived with Disability)	Serbia	Both	Age-standardized	Low back pain	Occupational ergonomic factors	Rate	1990	481.832	787.968	265.443	2021	482.966	760.336	276.698	1.13474
44	YLDs (Years Lived with Disability)	Slovakia	Both	Age-standardized	Low back pain	Occupational ergonomic factors	Rate	1990	328.925	498.26	196.64	2021	317.212	491.34	187.959	-11.7127
45	YLDs (Years Lived with Disability)	Slovenia	Both	Age-standardized	Low back pain	Occupational ergonomic factors	Rate	1990	356.986	560.016	209.17	2021	346.234	541.405	202.926	-10.7523
46	YLDs (Years Lived with Disability)	Belarus	Both	Age-standardized	Low back pain	Occupational ergonomic factors	Rate	1990	313.128	499.491	179.061	2021	310.472	478.934	181.783	-2.65673
47	YLDs (Years Lived with Disability)	Estonia	Both	Age-standardized	Low back pain	Occupational ergonomic factors	Rate	1990	355	543.16	212.819	2021	282.73	430.426	169.002	-72.2704
48	YLDs (Years Lived with Disability)	Latvia	Both	Age-standardized	Low back pain	Occupational ergonomic factors	Rate	1990	358.341	571.071	206.755	2021	298.792	464.265	176.93	-59.5494
49	YLDs (Years Lived with Disability)	Lithuania	Both	Age-standardized	Low back pain	Occupational ergonomic factors	Rate	1990	398.553	628.758	228.822	2021	332.319	515.634	197.092	-66.2336
50	YLDs (Years Lived with Disability)	Russian Federation	Both	Age-standardized	Low back pain	Occupational ergonomic factors	Rate	1990	316.868	490.77	187.384	2021	280.362	431.825	165.68	-36.5053
51	YLDs (Years Lived with Disability)	Republic of Moldova	Both	Age-standardized	Low back pain	Occupational ergonomic factors	Rate	1990	514.262	822.725	291.36	2021	313.65	503.11	178.32	-200.612
52	YLDs (Years Lived with Disability)	Ukraine	Both	Age-standardized	Low back pain	Occupational ergonomic factors	Rate	1990	347.007	542.643	201.712	2021	284.553	439.086	169.094	-62.4545
53	YLDs (Years Lived with Disability)	Brunei Darussalam	Both	Age-standardized	Low back pain	Occupational ergonomic factors	Rate	1990	212.713	329.417	125.622	2021	196.099	301.6	116.547	-16.6144
54	YLDs (Years Lived with Disability)	Japan	Both	Age-standardized	Low back pain	Occupational ergonomic factors	Rate	1990	317.18	485.295	189.653	2021	292.052	447.975	172.943	-25.1278
55	YLDs (Years Lived with Disability)	Republic of Korea	Both	Age-standardized	Low back pain	Occupational ergonomic factors	Rate	1990	363.431	568.581	211.944	2021	274.609	432.765	158.997	-88.8223
56	YLDs (Years Lived with Disability)	Singapore	Both	Age-standardized	Low back pain	Occupational ergonomic factors	Rate	1990	153.292	236.367	90.9961	2021	166.301	259.826	97.7292	13.0092
57	YLDs (Years Lived with Disability)	Australia	Both	Age-standardized	Low back pain	Occupational ergonomic factors	Rate	1990	355.292	542.043	211.695	2021	310.425	479.354	181.96	-44.8668
58	YLDs (Years Lived with Disability)	New Zealand	Both	Age-standardized	Low back pain	Occupational ergonomic factors	Rate	1990	394.118	609.783	232.704	2021	371.792	586.952	213.494	-22.3263
59	YLDs (Years Lived with Disability)	Andorra	Both	Age-standardized	Low back pain	Occupational ergonomic factors	Rate	1990	232.648	368.463	132.93	2021	224.748	351.167	129.024	-7.8992
60	YLDs (Years Lived with Disability)	Austria	Both	Age-standardized	Low back pain	Occupational ergonomic factors	Rate	1990	211.641	326.875	123.856	2021	230.405	356.387	133.705	18.7632
61	YLDs (Years Lived with Disability)	Denmark	Both	Age-standardized	Low back pain	Occupational ergonomic factors	Rate	1990	350.334	520.825	220.058	2021	307.896	486.752	179.957	-42.438
62	YLDs (Years Lived with Disability)	Belgium	Both	Age-standardized	Low back pain	Occupational ergonomic factors	Rate	1990	180.182	279.264	105.257	2021	209.208	325.191	123.541	29.0267
63	YLDs (Years Lived with Disability)	Cyprus	Both	Age-standardized	Low back pain	Occupational ergonomic factors	Rate	1990	257.72	400.274	150.636	2021	243.325	376.9	143.962	-14.395
64	YLDs (Years Lived with Disability)	Finland	Both	Age-standardized	Low back pain	Occupational ergonomic factors	Rate	1990	249.83	380.804	151.013	2021	232.977	360.584	137.567	-16.853
65	YLDs (Years Lived with Disability)	France	Both	Age-standardized	Low back pain	Occupational ergonomic factors	Rate	1990	237.907	366.151	140.705	2021	237.836	365.04	141.446	-0.0711764
66	YLDs (Years Lived with Disability)	Germany	Both	Age-standardized	Low back pain	Occupational ergonomic factors	Rate	1990	278.237	427.113	167.269	2021	288.753	442.172	173.867	10.5159
67	YLDs (Years Lived with Disability)	Greece	Both	Age-standardized	Low back pain	Occupational ergonomic factors	Rate	1990	334.005	523.364	194.488	2021	257.257	407.115	145.396	-76.7478
68	YLDs (Years Lived with Disability)	Iceland	Both	Age-standardized	Low back pain	Occupational ergonomic factors	Rate	1990	387.07	600.77	228.373	2021	311.435	479.993	186.906	-75.6354
69	YLDs (Years Lived with Disability)	Ireland	Both	Age-standardized	Low back pain	Occupational ergonomic factors	Rate	1990	240.062	372.936	140.609	2021	245.865	379.218	146.88	5.80387
70	YLDs (Years Lived with Disability)	Italy	Both	Age-standardized	Low back pain	Occupational ergonomic factors	Rate	1990	224.888	345.375	134.245	2021	213.603	330.066	126.466	-11.2849
71	YLDs (Years Lived with Disability)	Israel	Both	Age-standardized	Low back pain	Occupational ergonomic factors	Rate	1990	187.833	287.598	112.098	2021	223.871	344.47	131.168	36.0389
72	YLDs (Years Lived with Disability)	Luxembourg	Both	Age-standardized	Low back pain	Occupational ergonomic factors	Rate	1990	206.898	320.389	123.979	2021	200.446	307.712	117.246	-6.45142
73	YLDs (Years Lived with Disability)	Malta	Both	Age-standardized	Low back pain	Occupational ergonomic factors	Rate	1990	200.107	312.189	116.544	2021	233.147	362.509	138.183	33.0393
74	YLDs (Years Lived with Disability)	Netherlands	Both	Age-standardized	Low back pain	Occupational ergonomic factors	Rate	1990	171.894	266.343	101.361	2021	211.155	326.056	124.197	39.2611
75	YLDs (Years Lived with Disability)	Norway	Both	Age-standardized	Low back pain	Occupational ergonomic factors	Rate	1990	269.913	415.128	160.829	2021	239.061	366.509	141.15	-30.852
76	YLDs (Years Lived with Disability)	Portugal	Both	Age-standardized	Low back pain	Occupational ergonomic factors	Rate	1990	362.476	562.659	214.194	2021	339.007	526.766	199.231	-23.4691
77	YLDs (Years Lived with Disability)	Spain	Both	Age-standardized	Low back pain	Occupational ergonomic factors	Rate	1990	195.862	287.056	124.572	2021	172.818	269.763	100.958	-23.0443
78	YLDs (Years Lived with Disability)	Sweden	Both	Age-standardized	Low back pain	Occupational ergonomic factors	Rate	1990	142.922	216.094	87.2645	2021	188.986	298.192	108.344	46.0648
79	YLDs (Years Lived with Disability)	Switzerland	Both	Age-standardized	Low back pain	Occupational ergonomic factors	Rate	1990	346.963	502.62	222.59	2021	290.787	450.311	170.013	-56.1766
80	YLDs (Years Lived with Disability)	United Kingdom	Both	Age-standardized	Low back pain	Occupational ergonomic factors	Rate	1990	215.393	327.223	128.875	2021	227.563	349.736	134.604	12.1699
81	YLDs (Years Lived with Disability)	Argentina	Both	Age-standardized	Low back pain	Occupational ergonomic factors	Rate	1990	214.629	337.792	124.867	2021	246.797	379.105	145.99	32.1684
82	YLDs (Years Lived with Disability)	Chile	Both	Age-standardized	Low back pain	Occupational ergonomic factors	Rate	1990	247.708	383.088	146.173	2021	269.125	413.099	159.982	21.4172
83	YLDs (Years Lived with Disability)	Uruguay	Both	Age-standardized	Low back pain	Occupational ergonomic factors	Rate	1990	207.07	317.481	124.038	2021	290.619	446.832	174.006	83.5486
84	YLDs (Years Lived with Disability)	Canada	Both	Age-standardized	Low back pain	Occupational ergonomic factors	Rate	1990	257.452	393.538	151.954	2021	232.007	355.118	136.331	-25.4454
85	YLDs (Years Lived with Disability)	United States of America	Both	Age-standardized	Low back pain	Occupational ergonomic factors	Rate	1990	301.986	451.11	183.254	2021	257.686	375.753	165.988	-44.3
86	YLDs (Years Lived with Disability)	Antigua and Barbuda	Both	Age-standardized	Low back pain	Occupational ergonomic factors	Rate	1990	148.305	234.201	84.6231	2021	144.619	225.788	84.0312	-3.68561
87	YLDs (Years Lived with Disability)	Bahamas	Both	Age-standardized	Low back pain	Occupational ergonomic factors	Rate	1990	126.783	196.83	73.6196	2021	139.815	218.802	80.2629	13.0322
88	YLDs (Years Lived with Disability)	Barbados	Both	Age-standardized	Low back pain	Occupational ergonomic factors	Rate	1990	149.996	229.041	88.909	2021	165.704	255.343	97.5849	15.7072
89	YLDs (Years Lived with Disability)	Belize	Both	Age-standardized	Low back pain	Occupational ergonomic factors	Rate	1990	182.436	288.78	105.686	2021	186.94	293.411	108.897	4.50355
90	YLDs (Years Lived with Disability)	Cuba	Both	Age-standardized	Low back pain	Occupational ergonomic factors	Rate	1990	129.202	206.324	73.4084	2021	123.187	188.233	72.988	-6.01485
91	YLDs (Years Lived with Disability)	Dominican Republic	Both	Age-standardized	Low back pain	Occupational ergonomic factors	Rate	1990	167.097	259.703	97.2759	2021	193.913	300.015	114.865	26.8162
92	YLDs (Years Lived with Disability)	Dominica	Both	Age-standardized	Low back pain	Occupational ergonomic factors	Rate	1990	210.014	335.794	119.255	2021	196.098	314.947	110.976	-13.9153
93	YLDs (Years Lived with Disability)	Grenada	Both	Age-standardized	Low back pain	Occupational ergonomic factors	Rate	1990	198.533	314.983	113.163	2021	191.507	302.801	109.844	-7.02599
94	YLDs (Years Lived with Disability)	Guyana	Both	Age-standardized	Low back pain	Occupational ergonomic factors	Rate	1990	160.638	256.681	90.0961	2021	148.639	234.918	85.6839	-11.9985
95	YLDs (Years Lived with Disability)	Haiti	Both	Age-standardized	Low back pain	Occupational ergonomic factors	Rate	1990	222.389	366	123.885	2021	271.118	441.033	155.315	48.7286
96	YLDs (Years Lived with Disability)	Jamaica	Both	Age-standardized	Low back pain	Occupational ergonomic factors	Rate	1990	198.079	309.105	115.046	2021	216.073	338.93	124.144	17.9939
97	YLDs (Years Lived with Disability)	Saint Lucia	Both	Age-standardized	Low back pain	Occupational ergonomic factors	Rate	1990	270.943	433.849	152.432	2021	198.429	315.145	111.751	-72.5131
98	YLDs (Years Lived with Disability)	Suriname	Both	Age-standardized	Low back pain	Occupational ergonomic factors	Rate	1990	107.844	169.328	61.6328	2021	136.959	216.095	79.5815	29.1157
99	YLDs (Years Lived with Disability)	Saint Vincent and the Grenadines	Both	Age-standardized	Low back pain	Occupational ergonomic factors	Rate	1990	157.425	254.498	89.4371	2021	150.647	242.215	84.943	-6.77845
100	YLDs (Years Lived with Disability)	Trinidad and Tobago	Both	Age-standardized	Low back pain	Occupational ergonomic factors	Rate	1990	133.864	205.899	77.9533	2021	157.292	246.465	91.5014	23.4287
101	YLDs (Years Lived with Disability)	Ecuador	Both	Age-standardized	Low back pain	Occupational ergonomic factors	Rate	1990	149.621	231.946	87.5711	2021	205.197	311.009	125.432	55.5764
102	YLDs (Years Lived with Disability)	Bolivia (Plurinational State of)	Both	Age-standardized	Low back pain	Occupational ergonomic factors	Rate	1990	247.091	395.233	139.608	2021	311.197	492.997	177.657	64.1055
103	YLDs (Years Lived with Disability)	Colombia	Both	Age-standardized	Low back pain	Occupational ergonomic factors	Rate	1990	174.345	272.735	100.108	2021	221.745	337.668	131.257	47.3996
104	YLDs (Years Lived with Disability)	Peru	Both	Age-standardized	Low back pain	Occupational ergonomic factors	Rate	1990	154.561	242.654	88.2516	2021	215.541	335.622	126.126	60.9801
105	YLDs (Years Lived with Disability)	Costa Rica	Both	Age-standardized	Low back pain	Occupational ergonomic factors	Rate	1990	198.82	309.467	116.596	2021	199.028	306.992	117.522	0.207555
106	YLDs (Years Lived with Disability)	El Salvador	Both	Age-standardized	Low back pain	Occupational ergonomic factors	Rate	1990	194.327	302.523	114.374	2021	238.111	369.332	142.149	43.7838
107	YLDs (Years Lived with Disability)	Guatemala	Both	Age-standardized	Low back pain	Occupational ergonomic factors	Rate	1990	352.748	553.99	205.703	2021	292.301	456.52	171.884	-60.4471
108	YLDs (Years Lived with Disability)	Honduras	Both	Age-standardized	Low back pain	Occupational ergonomic factors	Rate	1990	201.968	315.839	117.327	2021	247.746	384.542	144.257	45.7777
109	YLDs (Years Lived with Disability)	Mexico	Both	Age-standardized	Low back pain	Occupational ergonomic factors	Rate	1990	241.267	383.202	139.73	2021	233.554	363.678	138.471	-7.7133
110	YLDs (Years Lived with Disability)	Nicaragua	Both	Age-standardized	Low back pain	Occupational ergonomic factors	Rate	1990	263.061	413.616	152.398	2021	281.836	438.051	163.948	18.7753
111	YLDs (Years Lived with Disability)	Panama	Both	Age-standardized	Low back pain	Occupational ergonomic factors	Rate	1990	199.09	309.242	116.359	2021	259.179	406.395	150.676	60.0888
112	YLDs (Years Lived with Disability)	Venezuela (Bolivarian Republic of)	Both	Age-standardized	Low back pain	Occupational ergonomic factors	Rate	1990	171.698	263.927	100.695	2021	186.738	292.476	109.504	15.0399
113	YLDs (Years Lived with Disability)	Brazil	Both	Age-standardized	Low back pain	Occupational ergonomic factors	Rate	1990	326.749	521.261	185.157	2021	318.589	503.447	184.12	-8.15995
114	YLDs (Years Lived with Disability)	Paraguay	Both	Age-standardized	Low back pain	Occupational ergonomic factors	Rate	1990	203.922	310.313	121.871	2021	333.938	525.621	194.355	130.016
115	YLDs (Years Lived with Disability)	Algeria	Both	Age-standardized	Low back pain	Occupational ergonomic factors	Rate	1990	163.943	266.767	90.3872	2021	156.543	247.254	89.5582	-7.40034
116	YLDs (Years Lived with Disability)	Egypt	Both	Age-standardized	Low back pain	Occupational ergonomic factors	Rate	1990	224.454	363.097	125.858	2021	263.364	424.993	145.254	38.9099
117	YLDs (Years Lived with Disability)	Iran (Islamic Republic of)	Both	Age-standardized	Low back pain	Occupational ergonomic factors	Rate	1990	244.672	391.261	139.328	2021	214.525	335.572	124.317	-30.1465
118	YLDs (Years Lived with Disability)	Bahrain	Both	Age-standardized	Low back pain	Occupational ergonomic factors	Rate	1990	148.664	232.309	86.1946	2021	174.662	273.407	101.031	25.9987
119	YLDs (Years Lived with Disability)	Iraq	Both	Age-standardized	Low back pain	Occupational ergonomic factors	Rate	1990	132.146	209.701	76.3797	2021	128.295	199.491	74.7026	-3.85118
120	YLDs (Years Lived with Disability)	Kuwait	Both	Age-standardized	Low back pain	Occupational ergonomic factors	Rate	1990	154.516	238.212	90.2746	2021	175.454	274.476	102.178	20.9381
121	YLDs (Years Lived with Disability)	Jordan	Both	Age-standardized	Low back pain	Occupational ergonomic factors	Rate	1990	129.857	206.313	74.321	2021	116.842	184.354	66.6842	-13.015
122	YLDs (Years Lived with Disability)	Lebanon	Both	Age-standardized	Low back pain	Occupational ergonomic factors	Rate	1990	170.589	276.037	94.1419	2021	152.831	243.534	87.5623	-17.7581
123	YLDs (Years Lived with Disability)	Morocco	Both	Age-standardized	Low back pain	Occupational ergonomic factors	Rate	1990	231.003	377.052	131.349	2021	361.278	588.538	198.556	130.275
124	YLDs (Years Lived with Disability)	Libya	Both	Age-standardized	Low back pain	Occupational ergonomic factors	Rate	1990	185.766	302.576	104.748	2021	165.737	265.355	93.897	-20.0298
125	YLDs (Years Lived with Disability)	Palestine	Both	Age-standardized	Low back pain	Occupational ergonomic factors	Rate	1990	197.01	327.196	106.449	2021	149.686	235.956	86.0019	-47.3248
126	YLDs (Years Lived with Disability)	Oman	Both	Age-standardized	Low back pain	Occupational ergonomic factors	Rate	1990	195.565	321.399	105.173	2021	188.832	295.005	108.514	-6.73295
127	YLDs (Years Lived with Disability)	Qatar	Both	Age-standardized	Low back pain	Occupational ergonomic factors	Rate	1990	231.121	361.894	135.924	2021	245.432	382.379	143.541	14.3108
128	YLDs (Years Lived with Disability)	Saudi Arabia	Both	Age-standardized	Low back pain	Occupational ergonomic factors	Rate	1990	168.201	266.13	96.8277	2021	151.65	235.714	88.6852	-16.551
129	YLDs (Years Lived with Disability)	Syrian Arab Republic	Both	Age-standardized	Low back pain	Occupational ergonomic factors	Rate	1990	251.705	410.055	140.016	2021	174.6	285.598	97.6544	-77.1052
130	YLDs (Years Lived with Disability)	Tunisia	Both	Age-standardized	Low back pain	Occupational ergonomic factors	Rate	1990	221.464	349.573	126.897	2021	203.846	326.82	116.336	-17.6175
131	YLDs (Years Lived with Disability)	United Arab Emirates	Both	Age-standardized	Low back pain	Occupational ergonomic factors	Rate	1990	221.41	347.463	130.205	2021	204.873	316.609	120.5	-16.5371
132	YLDs (Years Lived with Disability)	Turkey	Both	Age-standardized	Low back pain	Occupational ergonomic factors	Rate	1990	373.267	566.456	223.317	2021	277.38	452.126	157.475	-95.8863
133	YLDs (Years Lived with Disability)	Yemen	Both	Age-standardized	Low back pain	Occupational ergonomic factors	Rate	1990	290.61	473.604	158.067	2021	196.48	314.542	108.851	-94.1302
134	YLDs (Years Lived with Disability)	Afghanistan	Both	Age-standardized	Low back pain	Occupational ergonomic factors	Rate	1990	271.989	441.987	147.995	2021	288.427	472.483	161.022	16.4378
135	YLDs (Years Lived with Disability)	Bangladesh	Both	Age-standardized	Low back pain	Occupational ergonomic factors	Rate	1990	345.007	545.906	196.632	2021	375.208	612.247	213.086	30.2005
136	YLDs (Years Lived with Disability)	Bhutan	Both	Age-standardized	Low back pain	Occupational ergonomic factors	Rate	1990	636.321	1000.63	370.817	2021	620.745	975.87	358.889	-15.5759
137	YLDs (Years Lived with Disability)	India	Both	Age-standardized	Low back pain	Occupational ergonomic factors	Rate	1990	323.248	513.896	186.021	2021	207.911	332.648	119.106	-115.337
138	YLDs (Years Lived with Disability)	Nepal	Both	Age-standardized	Low back pain	Occupational ergonomic factors	Rate	1990	971.742	1487.81	586.965	2021	657.884	1042.28	369.498	-313.858
139	YLDs (Years Lived with Disability)	Pakistan	Both	Age-standardized	Low back pain	Occupational ergonomic factors	Rate	1990	205.647	344.138	111.042	2021	344.991	574.507	187.109	139.344
140	YLDs (Years Lived with Disability)	Angola	Both	Age-standardized	Low back pain	Occupational ergonomic factors	Rate	1990	482.867	766.612	276.405	2021	331.75	529.454	192.578	-151.117
141	YLDs (Years Lived with Disability)	Central African Republic	Both	Age-standardized	Low back pain	Occupational ergonomic factors	Rate	1990	446.599	710.383	255.988	2021	402.177	647.528	229.714	-44.4226
142	YLDs (Years Lived with Disability)	Congo	Both	Age-standardized	Low back pain	Occupational ergonomic factors	Rate	1990	337.303	542.064	189.552	2021	255.006	409.809	144.89	-82.2971
143	YLDs (Years Lived with Disability)	Democratic Republic of the Congo	Both	Age-standardized	Low back pain	Occupational ergonomic factors	Rate	1990	461.873	731.652	267.001	2021	382.983	605.937	220.74	-78.8895
144	YLDs (Years Lived with Disability)	Gabon	Both	Age-standardized	Low back pain	Occupational ergonomic factors	Rate	1990	294.024	475.337	162.047	2021	197.734	316.998	112.29	-96.29
145	YLDs (Years Lived with Disability)	Equatorial Guinea	Both	Age-standardized	Low back pain	Occupational ergonomic factors	Rate	1990	436.758	697.462	251.117	2021	291.096	462.359	168.925	-145.662
146	YLDs (Years Lived with Disability)	Burundi	Both	Age-standardized	Low back pain	Occupational ergonomic factors	Rate	1990	597.218	936.318	353.943	2021	542.506	852.753	318.441	-54.7126
147	YLDs (Years Lived with Disability)	Comoros	Both	Age-standardized	Low back pain	Occupational ergonomic factors	Rate	1990	370.123	588.978	206.629	2021	330.225	534.097	184.581	-39.8988
148	YLDs (Years Lived with Disability)	Djibouti	Both	Age-standardized	Low back pain	Occupational ergonomic factors	Rate	1990	365.258	591.153	205.921	2021	305.674	504.945	167.551	-59.5838
149	YLDs (Years Lived with Disability)	Eritrea	Both	Age-standardized	Low back pain	Occupational ergonomic factors	Rate	1990	224.13	348.98	131.177	2021	238.887	369.957	138.908	14.7577
150	YLDs (Years Lived with Disability)	Ethiopia	Both	Age-standardized	Low back pain	Occupational ergonomic factors	Rate	1990	471.333	741.109	272.51	2021	295.987	459.06	173.308	-175.345
151	YLDs (Years Lived with Disability)	Malawi	Both	Age-standardized	Low back pain	Occupational ergonomic factors	Rate	1990	501.797	778.153	298.071	2021	457.667	723.696	261.59	-44.1294
152	YLDs (Years Lived with Disability)	Kenya	Both	Age-standardized	Low back pain	Occupational ergonomic factors	Rate	1990	472.038	747.532	271.056	2021	447.151	705.714	262.025	-24.8868
153	YLDs (Years Lived with Disability)	Madagascar	Both	Age-standardized	Low back pain	Occupational ergonomic factors	Rate	1990	640.052	996.941	377.43	2021	513.841	804.647	300.353	-126.211
154	YLDs (Years Lived with Disability)	Mauritius	Both	Age-standardized	Low back pain	Occupational ergonomic factors	Rate	1990	148.442	229.414	87.0018	2021	155.497	243.658	91.1395	7.05458
155	YLDs (Years Lived with Disability)	Mozambique	Both	Age-standardized	Low back pain	Occupational ergonomic factors	Rate	1990	631.86	982.693	369.931	2021	622.113	968.899	369.05	-9.74724
156	YLDs (Years Lived with Disability)	Rwanda	Both	Age-standardized	Low back pain	Occupational ergonomic factors	Rate	1990	698.645	1094.51	415.95	2021	530.121	833.582	305.439	-168.524
157	YLDs (Years Lived with Disability)	Seychelles	Both	Age-standardized	Low back pain	Occupational ergonomic factors	Rate	1990	231.742	371.232	130.081	2021	182.78	283.156	106.723	-48.9627
158	YLDs (Years Lived with Disability)	United Republic of Tanzania	Both	Age-standardized	Low back pain	Occupational ergonomic factors	Rate	1990	607.413	940.788	358.405	2021	567.22	884.376	332.912	-40.1925
159	YLDs (Years Lived with Disability)	Somalia	Both	Age-standardized	Low back pain	Occupational ergonomic factors	Rate	1990	524.212	825.836	301.536	2021	538.375	845.009	313.23	14.1635
160	YLDs (Years Lived with Disability)	Uganda	Both	Age-standardized	Low back pain	Occupational ergonomic factors	Rate	1990	627.266	970.85	368.213	2021	557.404	875.632	324.11	-69.8613
161	YLDs (Years Lived with Disability)	Zambia	Both	Age-standardized	Low back pain	Occupational ergonomic factors	Rate	1990	335.986	523.604	196.679	2021	345.669	550.113	199.584	9.6831
162	YLDs (Years Lived with Disability)	Botswana	Both	Age-standardized	Low back pain	Occupational ergonomic factors	Rate	1990	222.309	363.567	123.747	2021	236.971	380.501	134.297	14.6623
163	YLDs (Years Lived with Disability)	Lesotho	Both	Age-standardized	Low back pain	Occupational ergonomic factors	Rate	1990	258.411	413.096	148.592	2021	197.545	309.198	115.825	-60.8659
164	YLDs (Years Lived with Disability)	Namibia	Both	Age-standardized	Low back pain	Occupational ergonomic factors	Rate	1990	276.211	449.672	154.856	2021	297.387	471.182	170.802	21.1757
165	YLDs (Years Lived with Disability)	South Africa	Both	Age-standardized	Low back pain	Occupational ergonomic factors	Rate	1990	142.039	225.58	81.8463	2021	115.779	178.255	68.8446	-26.2596
166	YLDs (Years Lived with Disability)	Eswatini	Both	Age-standardized	Low back pain	Occupational ergonomic factors	Rate	1990	182.832	302.616	99.8484	2021	148.443	237.768	85.8191	-34.3898
167	YLDs (Years Lived with Disability)	Zimbabwe	Both	Age-standardized	Low back pain	Occupational ergonomic factors	Rate	1990	383.996	595.666	223.47	2021	500.62	787.602	292.931	116.624
168	YLDs (Years Lived with Disability)	Benin	Both	Age-standardized	Low back pain	Occupational ergonomic factors	Rate	1990	492.55	779.39	285.016	2021	416.522	662.681	240.609	-76.0279
169	YLDs (Years Lived with Disability)	Burkina Faso	Both	Age-standardized	Low back pain	Occupational ergonomic factors	Rate	1990	496.215	763.829	290.396	2021	422.169	673.351	241.046	-74.0458
170	YLDs (Years Lived with Disability)	Chad	Both	Age-standardized	Low back pain	Occupational ergonomic factors	Rate	1990	548.507	859.847	317.597	2021	486.998	774.417	276.556	-61.5094
171	YLDs (Years Lived with Disability)	Cameroon	Both	Age-standardized	Low back pain	Occupational ergonomic factors	Rate	1990	535.951	845.557	308.967	2021	516.447	809.401	301.81	-19.5049
172	YLDs (Years Lived with Disability)	Cabo Verde	Both	Age-standardized	Low back pain	Occupational ergonomic factors	Rate	1990	363.344	591.818	200.507	2021	276.617	445.76	156.764	-86.7266
173	YLDs (Years Lived with Disability)	Coted'Ivoire	Both	Age-standardized	Low back pain	Occupational ergonomic factors	Rate	1990	426.116	678.2	244.879	2021	355.232	570.437	202.062	-70.8839
174	YLDs (Years Lived with Disability)	Gambia	Both	Age-standardized	Low back pain	Occupational ergonomic factors	Rate	1990	323.143	523.69	174.254	2021	287.099	463.694	162.684	-36.0438
175	YLDs (Years Lived with Disability)	Ghana	Both	Age-standardized	Low back pain	Occupational ergonomic factors	Rate	1990	399.45	620.591	234.903	2021	334.085	519.488	197.832	-65.3647
176	YLDs (Years Lived with Disability)	Guinea	Both	Age-standardized	Low back pain	Occupational ergonomic factors	Rate	1990	549.652	859.3	319.183	2021	520.215	821.235	299.888	-29.4369
177	YLDs (Years Lived with Disability)	Guinea-Bissau	Both	Age-standardized	Low back pain	Occupational ergonomic factors	Rate	1990	408.197	664.997	230.662	2021	373.55	605.767	209.59	-34.6467
178	YLDs (Years Lived with Disability)	Mali	Both	Age-standardized	Low back pain	Occupational ergonomic factors	Rate	1990	380.137	596.738	218.208	2021	379.734	600.539	218.728	-0.403336
179	YLDs (Years Lived with Disability)	Mauritania	Both	Age-standardized	Low back pain	Occupational ergonomic factors	Rate	1990	313.256	502.317	175.032	2021	239.502	388.456	131.496	-73.754
180	YLDs (Years Lived with Disability)	Liberia	Both	Age-standardized	Low back pain	Occupational ergonomic factors	Rate	1990	433.918	686.298	248.006	2021	380.647	596.252	222.554	-53.2716
181	YLDs (Years Lived with Disability)	Niger	Both	Age-standardized	Low back pain	Occupational ergonomic factors	Rate	1990	447.032	706.853	256.413	2021	453.171	725.082	257.39	6.13913
182	YLDs (Years Lived with Disability)	Nigeria	Both	Age-standardized	Low back pain	Occupational ergonomic factors	Rate	1990	337.184	533.825	195.047	2021	324.405	512.397	186.448	-12.7786
183	YLDs (Years Lived with Disability)	Sao Tome and Principe	Both	Age-standardized	Low back pain	Occupational ergonomic factors	Rate	1990	191.173	301.65	109.266	2021	170.753	277.572	95.8694	-20.4205
184	YLDs (Years Lived with Disability)	Sierra Leone	Both	Age-standardized	Low back pain	Occupational ergonomic factors	Rate	1990	458.324	728.976	261.204	2021	375.673	594.126	216.71	-82.651
185	YLDs (Years Lived with Disability)	Senegal	Both	Age-standardized	Low back pain	Occupational ergonomic factors	Rate	1990	338.626	546.259	188.751	2021	279.049	449.192	155.818	-59.5777
186	YLDs (Years Lived with Disability)	American Samoa	Both	Age-standardized	Low back pain	Occupational ergonomic factors	Rate	1990	131.712	203.115	76.9306	2021	157.404	252.693	88.6421	25.6916
187	YLDs (Years Lived with Disability)	Togo	Both	Age-standardized	Low back pain	Occupational ergonomic factors	Rate	1990	456.905	725.642	263.243	2021	359.846	564.203	205.479	-97.0594
188	YLDs (Years Lived with Disability)	Bermuda	Both	Age-standardized	Low back pain	Occupational ergonomic factors	Rate	1990	162.209	256.98	93.5716	2021	141.77	223.453	80.219	-20.4393
189	YLDs (Years Lived with Disability)	Cook Islands	Both	Age-standardized	Low back pain	Occupational ergonomic factors	Rate	1990	160.951	252.751	92.6205	2021	214.257	336.693	123.573	53.3056
190	YLDs (Years Lived with Disability)	Greenland	Both	Age-standardized	Low back pain	Occupational ergonomic factors	Rate	1990	323.195	513.115	185.769	2021	261.575	410.37	152.293	-61.62
191	YLDs (Years Lived with Disability)	Guam	Both	Age-standardized	Low back pain	Occupational ergonomic factors	Rate	1990	136.783	213.379	80.7402	2021	142.141	222.313	81.9473	5.35715
192	YLDs (Years Lived with Disability)	Monaco	Both	Age-standardized	Low back pain	Occupational ergonomic factors	Rate	1990	217.004	344.085	125.142	2021	198.872	309.974	115.178	-18.1325
193	YLDs (Years Lived with Disability)	Nauru	Both	Age-standardized	Low back pain	Occupational ergonomic factors	Rate	1990	149.484	237.088	84.8485	2021	191.181	303.664	108.556	41.6971
194	YLDs (Years Lived with Disability)	Niue	Both	Age-standardized	Low back pain	Occupational ergonomic factors	Rate	1990	143.937	227.303	83.0157	2021	183.747	296.759	101.968	39.8094
195	YLDs (Years Lived with Disability)	Northern Mariana Islands	Both	Age-standardized	Low back pain	Occupational ergonomic factors	Rate	1990	154.552	242.501	90.1022	2021	154.378	242.069	89.6344	-0.174275
196	YLDs (Years Lived with Disability)	Palau	Both	Age-standardized	Low back pain	Occupational ergonomic factors	Rate	1990	145.173	226.959	84.0437	2021	188.903	295.216	107.393	43.7299
197	YLDs (Years Lived with Disability)	Saint Kitts and Nevis	Both	Age-standardized	Low back pain	Occupational ergonomic factors	Rate	1990	181.752	280.934	106.526	2021	153.714	242.48	87.8255	-28.0375
198	YLDs (Years Lived with Disability)	Puerto Rico	Both	Age-standardized	Low back pain	Occupational ergonomic factors	Rate	1990	96.1837	148.961	56.6738	2021	88.7196	143.021	49.7207	-7.46419
199	YLDs (Years Lived with Disability)	San Marino	Both	Age-standardized	Low back pain	Occupational ergonomic factors	Rate	1990	249.704	390.46	145.169	2021	243.251	378.644	141.647	-6.45295
200	YLDs (Years Lived with Disability)	Tokelau	Both	Age-standardized	Low back pain	Occupational ergonomic factors	Rate	1990	148.223	242.468	81.9563	2021	181.766	292.516	103.242	33.5425
201	YLDs (Years Lived with Disability)	Tuvalu	Both	Age-standardized	Low back pain	Occupational ergonomic factors	Rate	1990	152.005	241.402	85.3791	2021	194.643	310.424	111.284	42.6376
202	YLDs (Years Lived with Disability)	United States Virgin Islands	Both	Age-standardized	Low back pain	Occupational ergonomic factors	Rate	1990	151.515	240.826	85.3107	2021	151.123	238.473	86.5349	-0.392451
203	YLDs (Years Lived with Disability)	South Sudan	Both	Age-standardized	Low back pain	Occupational ergonomic factors	Rate	1990	497.837	785.712	283.718	2021	465.337	739.839	266.794	-32.4995
204	YLDs (Years Lived with Disability)	Sudan	Both	Age-standardized	Low back pain	Occupational ergonomic factors	Rate	1990	272.811	460.223	146.071	2021	249.318	410.275	138.313	-23.493
